# Supplementary material for: Augmented Enterocyte Damage During Candida albicans and Proteus mirabilis Coinfection
Source: Front Cell Infect Microbiol. 2022 May 16;12:866416. doi: 10.3389/fcimb.2022.866416 (PMC9149288; doi:10.3389/fcimb.2022.866416)
Supplement: Supplementary file 3 [file DataSheet_3.xlsx]

## Sheet: Fig. 1A
	P. m.					C.a.					coinf
HI4320	12.9	17.9	9.7	5.8		24.3	20.2	10	11.3		92.1	97.2	67.3	65.7
BA6163	10.9	9.8	36.2			9.2	10.4	24.5			74.6	62.9	107.2
DSM 4479	3.6	2.7	2.1	1.5	11.4	10.1	8.2	11.7	9.2	10.4	50.5	42.4	56.4	46.7	39.6
DSM 788	1.7	0.6	0.8			24.5	14.6	15			25.4	61.3	50.6

## Sheet: Fig. 1B
time [h]	C.a.			C.a. coinf			P.m.			P.m. coinf
-24	1010000	620000	1000000	1010000	620000	1000000	0	0	0	0	0	0
0	658000	119000	85800	658000	119000	85800	133000	92500	76000	133000	92500	76000
1	717000	130000	237000	514000	120000	350000	1490000	2810000	1870000	3190000	2750000	4570000
3	498000	81400	105000	537000	168000	344000	66500000	104000000	98300000	93700000	117000000	102000000
5	447000	334000	231000	166000	156000	125000	911000000	226000000	1070000000	521000000	363000000	567000000

## Sheet: Fig. 1C
	P.m.				C.a.					Coinfection
1000		18.2	15.3	8.6		2.5	1.9	1.1		125.3	110.5	98.8	high P.m.
100	17.1	18.2	15.3		11.7	3	11.8		124.5	109.3	108.7
10	17.1	18.2	15.3		18.6	16.9	24.9		105.4	101.6	108.2
1	17.1	18.2	15.3		0.5	11.6	16.8		70.7	75	84.2
0.1	17.1	18.2	15.3		6.4	4.4	5.7		48.9	38.2	45.7
1000	1.5	2.6	3.2			2.5	1.9			68.2	63.2		low P.m.
100	1.5	2.6	3.2		11.7	3	11.8		56.1	75.2	78.5
10	1.5	2.6	3.2		18.6	16.9	24.9		65	72.6	70.1
1	1.5	2.6	3.2		0.5	11.6	16.8		44.9	43.6	53.5
0.1	1.5	2.6	3.2		6.4	4.4	5.7		23.1	15	22.7

## Sheet: Fig. S1
	FDC
101	3.19	4.07	4.41
102	1.24	1.7	5.22
103	1.13	0.96	2.43
104	1.95	3.52	3.73
105	1.55	1.49	2.44
106	1.16	1.49	1.64
107	1.88	3.25	4.05
108	2.21	5.88	5

## Sheet: Fig. S2
	P.m.				C.a.				Coinfection
1000		18.1	15.8	8.6		0.3	0	-1.6		33.2	26.9	17.3	high P.m.
100	13	18.1	15.8		0.4	-0.1	-0.3		16.1	20.5	17.3
10	13	18.1	15.8		0.4	-0.1	0.4		11.8	17.9	14.5
1	13	18.1	15.8		0.1	0	0		11.3	17.6	16.4
0.1	13	18.1	15.8		-0.6	-0.2	-0.2		12.8	15.6	14.6
1000	1.7	2.6	3.5			0.3	0			3	4.1		low P.m.
100	1.7	2.6	3.5		0.4	-0.1	-0.3		1.5	3.2	4.4
10	1.7	2.6	3.5		0.4	-0.1	0.4		2.1	2.9	2.9
1	1.7	2.6	3.5		0.1	0	0		2.2	4.1	4.3
0.1	1.7	2.6	3.5		-0.6	-0.2	-0.2		1.4	3.4	2.8

## Sheet: Fig. 2A
	P. m.			yeast			coinf
WT	20.2	4.5	7.5	21.9	16.9	13.5	76.3	75.3	71.7
als3Δ/Δ	20.2	4.5	7.5	8.7	5.2	2.6	84.9	71.8	77.3

## Sheet: Fig. 2B
	P.m.							yeast							coinf
WT	5.8	7.5	15.2	18.3	6.5	19.7	18.1	20.7	14.7	9.7	16.9	7.55813	11	12.9	78.8	61.7	66.5	95.4	63.2	52.2	89
efg1Δ/Δ	15.3	19.7	18.1					-0.3	-1	-0.4					47.7	56.1	58.5
eed1Δ/Δ	14.1	19.7	18.1					-0.9	-0.2	-0.5					38.6	65	65.4
cap1Δ/Δ	21.1	6.1	19.7	18.1				7	4.58877	10.2	9.6				110.1	44.9	65.8	84
hgc1Δ/Δ	16.8	8.5	19.7					28.5	10.1379	15	59.3				68.4	60.9	67.2	132.9
efg1Δ/Δ/cph1Δ/Δ	5.8	7.5	15.2					-1.3	0.2	-0.1					40.9	40.6	51.7

## Sheet: Fig. 2C
	P. m.			yeast			coinf
WT	7.4	15.6	19.7	16.4735	41.2145	16.8	74.7	77.6	69.7
ece1Δ/Δ	7.2	15.6	19.7	-0.0306245	-0.308598	-0.7	34.9	70.6	64.7

## Sheet: Fig. 2D
	P.m.						C.a.						coinf
S. cerevisiae	5.8	15.2	33.9				0	0.4	4.4				78.4	58.2	113
C. glabrata	5.8	7.5	15.2	33.9			-1	-0.5	1.1	3.9			48	38.4	53.2	106.1
C. dubliniensis	5.8	7.5	15.2	33.9			-1.7	-0.2	0.6	3.5			70.2	46.6	59.4	121.2
C. tropicalis	8.7	7.7	6.4				2.5	-0.5	-0.3				68	67.7	59.1
C. parapsilosis	8.7	7.7	6.4				0.5	-1.1	-0.1				17.8	8.8	8.8
C. albicans	5.8	7.5	15.2	8.7	7.7	6.4	20.7	14.7	9.7	26.8	22.8	11.6	78.8	61.7	66.5	84.4	84.2	68.6

## Sheet: Fig. 3
	P.m.				C.a.				coinf
WT (HI4320)	12.9	17.9	9.7	5.8	24.3	20.2	10	11.3	92.1	97.2	67.3	65.7
ΔhpmA	-0.4	-0.2	-0.1		11.3	14.6	15		12.6	16.3	15.8
WT (BA6163)	32.5	10.9	9.8	36.2	9.2	10.4	24.5		74.6	62.9	107.2
ΔhmpA	-1.6	0.1	0		9.2	10.4	24.5		8.5	9.7	22.8

[truncated: 14 more sheets: Fig. 4, Fig. 5A, Fig. 5B, Fig. 6A, Fig. 6B, Fig. 6C, Fig. 6D, Fig. 6E, Fig. S3, Fig. S4, Fig. S5, Fig. S6A, Fig. S6B, Fig. 7]
